# Supplementary material
Source: publisher site journal article supplement (https://www.dovepress.com/article/486609)
Supplement: Supplementary file 1 [file get_supplementary_file.php]

Supplementary Figure 1. Correlation between PDGFB expression and overall survival analysis in pan-cancer. OS of PDGFB expression in BRCA, CESC, HNSC, KIRC, LUAD, LUSC, READ, SARC, STAD and THYM from KM plotter (A). OS of PDGFB expression in KIRC, LGG, LUSC, MESO and UVM from GEPIA (B). OS of PDGFB expression in KIRC, LUSC, and MESO from UALCAN (C). OS of PDGFB expression in CESC, KIRC, LUAD, and STAD from TISIDB (D).





Supplementary Figure 2. Correlation of PDGFB and immune checkpoint markers from GSE28238


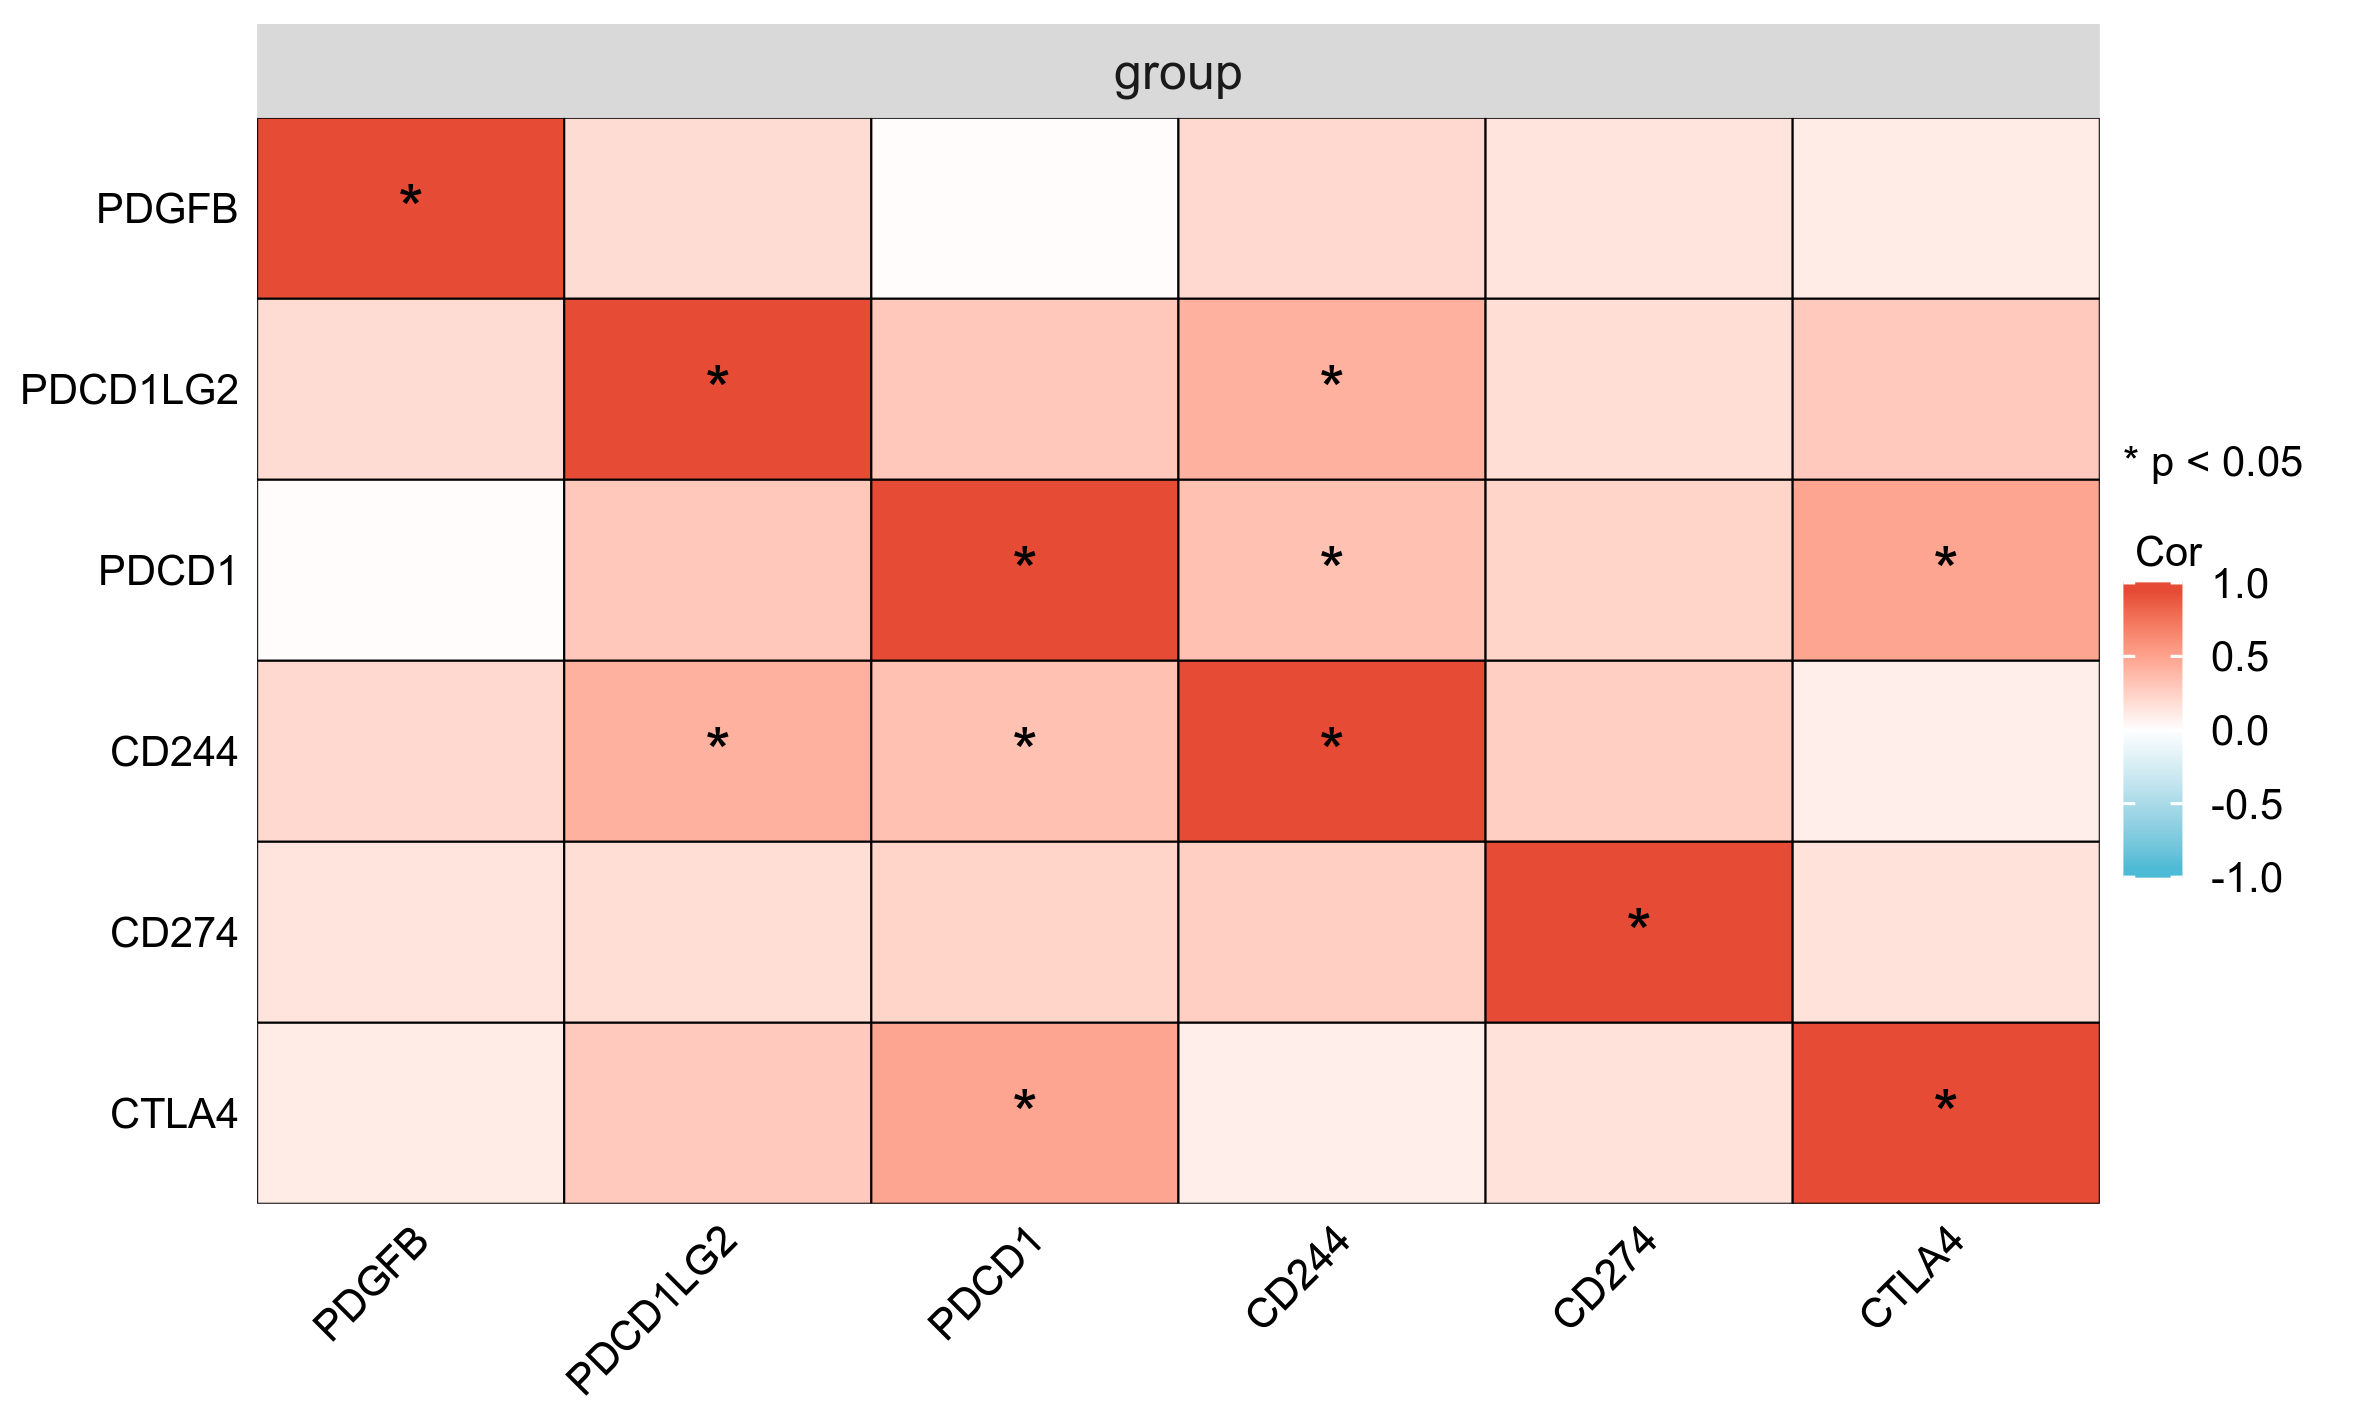


Supplementary Table 1. Patients samples included in GSCA and UALCAN

|  | Tumor samples | | Normal samples | |
| --- | --- | --- | --- | --- |
| Cancer type | GSCA | UALCAN | GSCA | UALCAN |
| ACC | 79 | 77 | 0 | 0 |
| BLCA | 408 | 408 | 19 | 19 |
| BRCA | 1104 | 1097 | 114 | 114 |
| CESC | 307 | 305 | 3 | 3 |
| CHOL | 36 | 36 | 9 | 9 |
| COAD | 288 | 286 | 41 | 41 |
| DLBC | 48 |  | 0 |  |
| ESCA | 185 | 184 | 11 | 11 |
| GBM | 169 | 156 | 5 | 5 |
| HNSC | 522 | 520 | 44 | 44 |
| KICH | 66 | 67 | 25 | 25 |
| KIRC | 534 | 533 | 72 | 72 |
| KIRP | 291 | 290 | 32 | 32 |
| LAML | 173 | 171 | 0 | 0 |
| LGG | 534 | 503 | 0 | 0 |
| LIHC | 374 | 377 | 50 | 50 |
| LUAD | 517 | 515 | 59 | 59 |
| LUSC | 503 | 503 | 51 | 52 |
| MESO | 87 | 87 | 0 | 0 |
| OV | 309 | 302 | 0 | 0 |
| PAAD | 179 | 178 | 4 | 4 |
| PCPG | 184 | 179 | 3 | 3 |
| PRAD | 498 | 497 | 52 | 52 |
| READ | 95 | 166 | 10 | 10 |
| SARC | 263 | 260 | 2 | 2 |
| SKCM | 473 | 472 | 1 | 1 |
| STAD | 415 | 415 | 35 | 34 |
| TGCT | 156 | 133 | 0 | 0 |
| THCA | 513 | 505 | 59 | 59 |
| THYM | 120 | 120 | 2 | 2 |
| UCEC | 177 | 546 | 24 | 35 |
| UCS | 57 | 57 | 0 | 0 |
| UVM | 80 | 79 | 0 | 0 |

Supplementary Table 2. Patient’s information

| No | Age | Gender | Grade | Survival |
| --- | --- | --- | --- | --- |
| 1 | 60 | Male | III | 0 |
| 2 | 58 | Female | III | 0 |
| 3 | 48 | Male | III | 1 |
| 4 | 28 | Male | II | 0 |
| 5 | 60 | Female | IV | 0 |
| 6 | 49 | Female | III-IV | 0 |
| 7 | 65 | Female | III | 0 |
| 8 | 47 | Female | III | 0 |
| 9 | 47 | Male | IV | 0 |
| 10 | 66 | Male | III | 0 |
| 11 | 69 | Female | III-IV | 0 |
| 12 | 48 | Male | III | 0 |
| 13 | 35 | Female | II | 0 |
| 14 | 75 | Male | III-IV | 0 |
| 15 | 62 | Male | II | 0 |
| 16 | 15 | Male | III-IV | 0 |
| 17 | 66 | Female | IV | 0 |
| 18 | 51 | Male | IV | 0 |
| 19 | 52 | Male | unknown | 0 |
| 20 | 72 | Male | IV | 0 |
| 21 | 28 | Female | II-III | 1 |
| 22 | 43 | Male | I | 0 |
| 23 | 57 | Male | III | 1 |
| 24 | 41 | Female | IV | 0 |
| 25 | 57 | Male | III-IV | 1 |
| 26 | 65 | Female | III | 0 |
| 27 | 65 | Male | II | 1 |
| 28 | 64 | Female | II | 0 |
| 29 | 69 | Male | III-IV | 0 |
| 30 | 69 | Male | II | 0 |
| 31 | 77 | Female | III | 1 |
| 32 | 60 | Female | III | 0 |
| 33 | 70 | Male | III | 0 |
| 34 | 58 | Male | unknown | 0 |
| 35 | 53 | Male | III-IV | 0 |
| 36 | 52 | Male | IV | 0 |
| 37 | 60 | Male | III | 1 |
| 38 | 64 | Male | III | 0 |
| 39 | 37 | Male | III | 0 |
| 40 | 41 | Female | II | 0 |
| 41 | 42 | Female | I-II | 0 |
| 42 | 64 | Male | III | 0 |
| 43 | 70 | Female | unknown | 0 |
| 44 | 75 | Female | II | 0 |
| 45 | 36 | Female | unknown | 0 |
| 46 | 65 | Female | III | 0 |
| 47 | 33 | Female | II | 0 |
| 48 | 49 | Male | IV | 0 |
| 49 | 48 | Male | III-IV | 0 |
| 50 | 65 | Female | III | 0 |
| 51 | 37 | Male | III | 0 |
| 52 | 75 | Female | II | 0 |

Supplementary Table 3. TOP 100 gene were selected through GEPIA database

| CDH5 | FLT1 | TIMP3 | SEC14L1 |
| --- | --- | --- | --- |
| PCDH12 | COL4A2 | RAMP2 | COL15A1 |
| BCL6B | LDB2 | GIMAP6 | GJA5 |
| CXorf36 | TEK | CCM2L | KIAA0355 |
| ARHGEF15 | KDR | CHST15 | ANGPT2 |
| ROBO4 | HID1-AS1 | ITGA1 | DYSF |
| COL4A1 | HSPG2 | HYAL2 | F2RL3 |
| CD93 | EPAS1 | EXOC3L1 | ADCY4 |
| ADGRL4 | ESAM | ITGB1P1 | ESM1 |
| TIE1 | GIMAP8 | APOLD1 | GJA4 |
| GPR4 | EMCN | IPO11 | JAK1 |
| ECSCR | EXOC3L2 | FGD5 | TMEM184B |
| CLEC14A | USHBP1 | ITGB1 | APBB2 |
| ENG | AC006126.4 | BMPR2 | OLFML2A |
| HECW2 | PECAM1 | TGFBR2 | PODXL |
| RP11-389C8.2 | MMRN2 | RP11-95G6.1 | GIMAP4 |
| MYCT1 | HEYL | AFAP1L1 | FMNL3 |
| ZNF366 | NRP1 | ETS1 | UBTFL6 |
| PDGFRB | FUT11 | RAPGEF5 | MFAP3 |
| DLL4 | RP11-598F7.5 | CDH13 | CRIM1 |
| PLVAP | PTP4A2P2 | S1PR1 | ANO6 |
| VWF | TMEM204 | THY1 | CALCRL |
| FLT4 | RP11-598F7.6 | THBS1 | STARD13 |
| RP11-672A2.4 | SMAD7 | CYYR1 | UNC5B |
| NOTCH4 | INSR | GRB10 | ARL15 |
